# Supplementary material
Source: HighWire-hosted journal article supplement (https://cmaj.ca/highwire/filestream/80865/field_highwire_adjunct_files/0/211038-case-3-at.pdf)
Supplement: 211038-case-3-at.pdf [file 211038-case-3-at.pdf]

**Appendix Table I.** Antimicrobial susceptibility (AST) of the *Neisseria gonorrhoeae* blood culture isolate performed at the National Microbiology Laboratory and interpreted according to the Clinical Laboratory Standards Institute, M100 Performance Standards for Antimicrobial Testing (30<sup>th</sup> Edition, January 2020) manual. The isolate was Beta-lactamase negative. AST is accredited by the Standards Council of Canada to Laboratory no. 594 - CAN-P-4E (ISO/IEC 17025).

| <b>Antimicrobial</b> | <b>Minimum Inhibitory Concentration<br/>in micrograms per milliliter (µg/mL)</b> | <b>Interpretation</b> |
|----------------------|----------------------------------------------------------------------------------|-----------------------|
| Penicillin           | 0.125                                                                            | Intermediate          |
| Spectinomycin        | 16                                                                               | Susceptible           |
| Erythromycin         | 2                                                                                | Resistant             |
| Tetracycline         | 1                                                                                | Intermediate          |
| Ceftriaxone          | 0.004                                                                            | Susceptible           |
| Ciprofloxacin        | 0.002                                                                            | Susceptible           |
| Cefixime             | 0.008                                                                            | Susceptible           |
| Azithromycin         | 1                                                                                | Susceptible           |
| Gentamicin           | 8                                                                                | Susceptible           |

**Appendix table 2.** *Neisseria gonorrhoeae* multi-antigen sequence typing (NG-MAST) performed by the *Streptococcus* and Sexually Transmitted Infections Unit of the National Microbiology Laboratory.

|           |          |
|-----------|----------|
| ST type   | ST-11508 |
| por type  | por-2206 |
| tbpB type | tbpB-29  |
